# Supplementary material
Source: HighWire-hosted journal article supplement (http://bmjopengastro.bmj.com/highwire/filestream/3187/field_highwire_adjunct_files/2/bmjgast-2022-000985supp003_data_supplement.pdf)

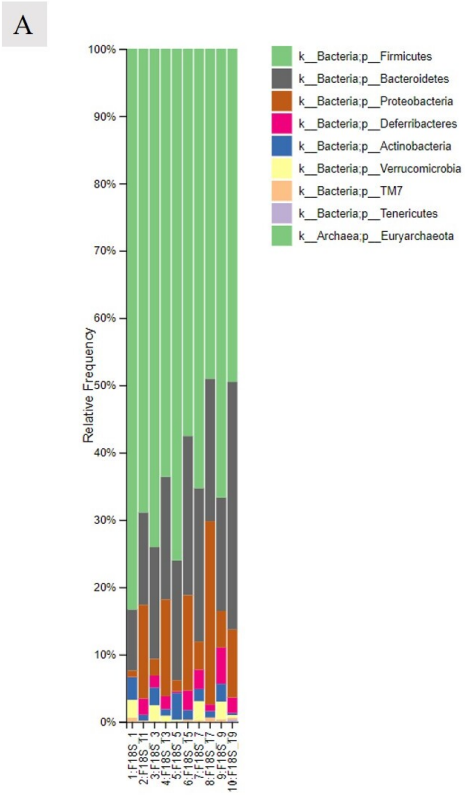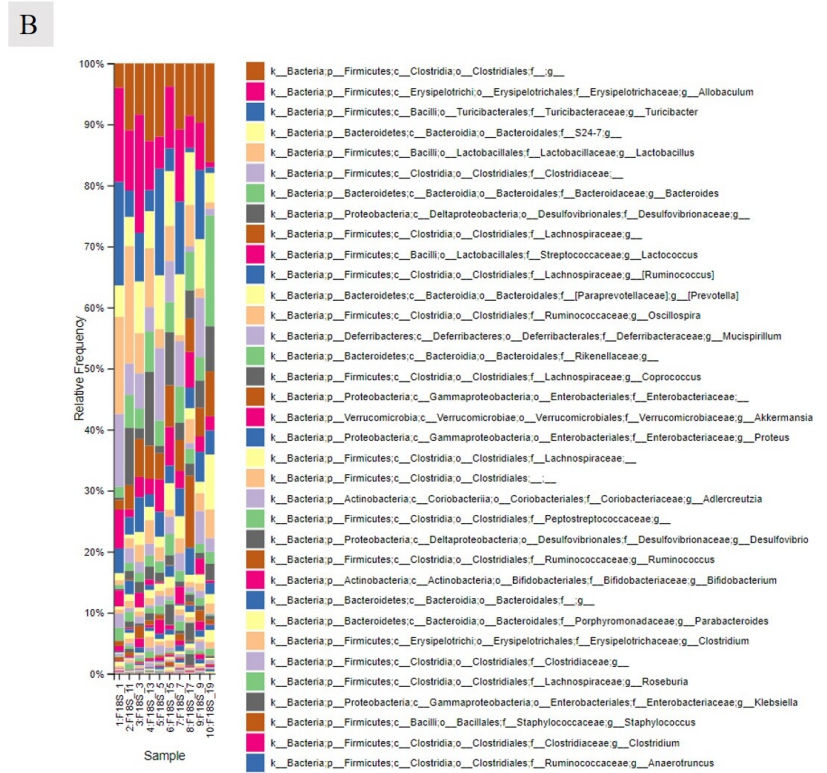

Supplement: bmjgast-2022-000985supp003_data_supplement.pdf [file bmjgast-2022-000985supp003_data_supplement.pdf]
